# Supplementary material for: Improving Glucocorticoid Sensitivity of Brain-Homing CD4+ T Helper Cells by Steroid Hormone Crosstalk
Source: PubMed Central journal article supplement (PMC9178273; doi:10.3389/fimmu.2022.893702), 2022-05-26
Supplement: DataSheet_1.pdf [file DataSheet_1.pdf]

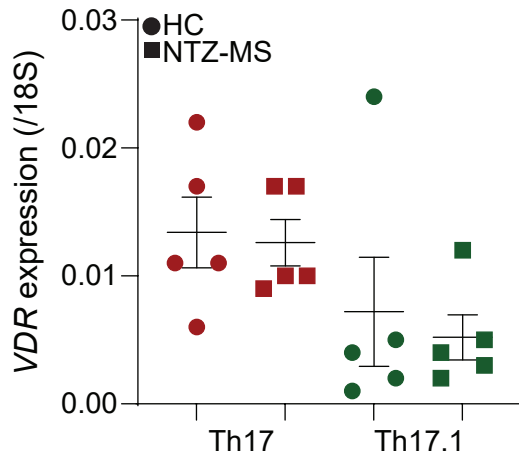

**Supplementary Figure 1.** VDR expression by healthy- and MS-derived Th17 and Th17.1 cells. Relative VDR expression by unstimulated Th17 and Th17.1 cells from healthy controls (HC,  $n = 5$ ) and MS patients treated with natalizumab for 12 months (NTZ-MS,  $n = 5$ ). Data were compared using Mann-Whitney U tests.
